# Supplementary material
Source: PubMed Central journal article supplement (PMC3817911)
Supplement: CJN.04310413_CJN04310413SupplementaryData.pdf [file CJN.04310413_CJN04310413SupplementaryData.pdf]

# Carbamylation of Serum Albumin and Erythropoietin Resistance in End Stage Kidney Disease

Sahir Kalim, M.D., M.M.Sc., Hector Tamez M.D., M.P.H., Julia Wenger, M.P.H., Elizabeth Ankers, B.A., Caitlin A. Trottier B.A., Joseph J. Deferio B.A., Anders H. Berg, M.D., Ph.D., S. Ananth Karumanchi, M.D., Ravi I. Thadhani, M.D., M.P.H.

## Supplemental Materials

**Supplemental Table 1.** Associations to natural log erythropoietin resistance index using single time point measurements at day 90

**Supplemental Table 2.** Associations to natural log erythropoietin resistance index using the entire cohort (no subjects excluded, n=187)

**Supplemental Table 3.** Baseline characteristics by 1-year mortality status in the entire cohort (no subjects excluded, n=187)

**Supplemental Figure 1.** Pearson correlations of percent carbamylated albumin level with erythropoietin dose and hemoglobin

**Supplemental Figure 2.** Odds ratio for death by erythropoietin resistance index (no subjects excluded, n= 187)

**Supplemental Table 1. Associations to natural log erythropoietin resistance index using single time point measurements at day 90**

| Predictor                      | Univariate Analysis        | P value           | Multivariable Model 1      | P value           | Multivariable Model 2      | P value           |
|--------------------------------|----------------------------|-------------------|----------------------------|-------------------|----------------------------|-------------------|
|                                | Change in log ERI (95% CI) |                   | Change in log ERI (95% CI) |                   | Change in log ERI (95% CI) |                   |
| Carbamylation quartile 4 vs. 1 | 0.38 (0.02, 0.75)          | 0.04 <sup>a</sup> | 0.36 (0.01, 0.71)          | 0.04 <sup>b</sup> | 0.45 (0.08, 0.82)          | 0.02 <sup>c</sup> |
| 3 vs. 1                        | 0.17 (-0.19, 0.53)         | 0.36 <sup>a</sup> | 0.18 (-0.16, 0.53)         | 0.30 <sup>b</sup> | 0.25 (-0.12, 0.63)         | 0.19 <sup>c</sup> |
| 2 vs. 1                        | -0.19 (-0.55, 0.18)        | 0.31 <sup>a</sup> | 0.08 (-0.25, 0.41)         | 0.63 <sup>b</sup> | 0.10 (-0.27, 0.47)         | 0.60 <sup>c</sup> |
| Age                            | 0.01 (-0.01, 0.02)         | 0.12              |                            |                   | -0.01 (-0.01, 0.01)        | 0.52              |
| Female                         | -0.03 (-0.29, 0.23)        | 0.82              |                            |                   | 0.09 (-0.20, 0.38)         | 0.56              |
| White Race                     | 0.01 (-0.28, 0.30)         | 0.94              |                            |                   | -0.04 (-0.33, 0.23)        | 0.73              |
| Urea Reduction Ratio           | 0.02 (0.01, 0.04)          | 0.02              | 0.01 (-0.01, 0.03)         | 0.17              | 0.02 (0.00, 0.04)          | 0.04              |
| Hemoglobin (g/dl)              | -0.28 (-0.36, -0.20)       | <0.001            | -0.26 (-0.35, -0.16)       | <0.001            | -0.25 (-0.35, -0.16)       | <0.001            |
| †Parathyroid Hormone (pg/ml)   | -0.09 (-0.25, 0.08)        | 0.31              |                            |                   | -0.03 (-0.20, 0.14)        | 0.70              |
| Albumin (g/dl)                 | -0.82 (-1.09, -0.55)       | <0.001            | -0.64 (-0.91, -0.36)       | <0.001            | -0.55 (-0.84, -0.25)       | <0.001            |
| †Ferritin (ng/ml)              | 0.13 (-0.02, 0.27)         | 0.08              | -0.01 (-0.15, 0.12)        | 0.87              | 0.02 (-0.12, 0.17)         | 0.74              |
| Transferrin Saturation (%)     | -0.01 (-0.03, 0.01)        | 0.16              |                            |                   | -0.01 (-0.02, 0.01)        | 0.44              |
| Received IV Iron Therapy       | -0.30 (-0.62, 0.02)        | 0.07              | 0.07 (-0.23, 0.38)         | 0.64              | 0.11 (-0.22, 0.44)         | 0.50              |
| Body Mass Index                | -0.05 (-0.07, -0.03)       | <0.001            | -0.03 (-0.05, -0.01)       | 0.006             | -0.02 (-0.04, -0.01)       | 0.02              |
| Vascular Access (catheter)     | -0.13 (-0.41, 0.14)        | 0.34              |                            |                   | -0.08 (-0.35, 0.19)        | 0.56              |
| †IL-6 (pg/ml)                  | 0.12 (0.02, 0.22)          | 0.02              | -0.03 (-0.12, 0.06)        | 0.52              | -0.05 (-0.16, 0.05)        | 0.32              |
| Myeloperoxidase (ng/ml)        | 0.00 (-0.01, 0.01)         | 0.89              |                            |                   | 0.00 (-0.01, 0.01)         | 0.91              |

Effect estimates of the association between various predictors and the natural log EPO resistance index (ERI) in univariate and multivariable analysis. Change in log ERI (95% CL) represents the change in the log ERI per unit change in the predictor (95% confidence interval).

Adjusted model 1 includes only variables significant in univariate analysis at P<0.1 level.

Adjusted model 2 includes all variables from the univariate analysis.

<sup>a</sup>P for overall trend across all quartiles = 0.01.

<sup>b</sup>P for overall trend across all quartiles = 0.04.

<sup>c</sup>P for overall trend across all quartiles = 0.01.

† Variable log-transformed.

**Supplemental Table 2. Associations to natural log erythropoietin resistance index using the entire cohort (no subjects excluded, n=187)**

| Predictor                    | Univariate Analysis<br>Change in log ERI<br>(95% CI) | P value            | Multivariable Model 1<br>Change in log ERI<br>(95% CI) | P value            | Multivariable Model 2<br>Change in log ERI<br>(95% CI) | P value            |
|------------------------------|------------------------------------------------------|--------------------|--------------------------------------------------------|--------------------|--------------------------------------------------------|--------------------|
| Carbamylation                |                                                      |                    |                                                        |                    |                                                        |                    |
| quartile 4 vs. 1             | 0.70 (0.24, 1.11)                                    | 0.002 <sup>a</sup> | 0.55 (0.18, 0.92)                                      | 0.004 <sup>b</sup> | 0.68 (0.26, 1.11)                                      | 0.002 <sup>c</sup> |
| 3 vs. 1                      | 0.27 (-0.15, 0.69)                                   | 0.21 <sup>a</sup>  | 0.07 (-0.28, 0.43)                                     | 0.69 <sup>b</sup>  | 0.23 (-0.20, 0.66)                                     | 0.29 <sup>c</sup>  |
| 2 vs. 1                      | -0.15 (-0.57, 0.26)                                  | 0.47 <sup>a</sup>  | -0.24 (-0.59, 0.11)                                    | 0.17 <sup>b</sup>  | -0.19 (-0.60, 0.21)                                    | 0.34 <sup>c</sup>  |
| Age                          | 0.01 (-0.01, 0.02)                                   | 0.27               |                                                        |                    | -0.01 (-0.01, 0.01)                                    | 0.79               |
| Female                       | -0.18 (-0.50, 0.13)                                  | 0.25               |                                                        |                    | -0.22 (-0.54, 0.09)                                    | 0.16               |
| White Race                   | -0.03 (-0.36, 0.31)                                  | 0.88               |                                                        |                    | 0.09 (-0.21, 0.38)                                     | 0.57               |
| Urea Reduction Ratio         | 0.01 (-0.01, 0.03)                                   | 0.50               |                                                        |                    | 0.01 (-0.01, 0.02)                                     | 0.71               |
| Hemoglobin (g/dl)            | -0.43 (-0.52, -0.34)                                 | <0.001             | -0.29 (-0.38, -0.20)                                   | <0.001             | -0.28 (-0.39, -0.18)                                   | <0.001             |
| †Parathyroid Hormone (pg/ml) | -0.15 (-0.34, 0.04)                                  | 0.12               |                                                        |                    | -0.06 (-0.23, 0.12)                                    | 0.53               |
| Albumin (g/dl)               | -1.0 (-1.31, -0.68)                                  | <0.001             | -0.46 (-0.79, -0.13)                                   | 0.01               | -0.44 (-0.82, -0.07)                                   | 0.02               |
| †Ferritin (ng/ml)            | -0.20 (-0.36, -0.04)                                 | 0.01               | -0.11 (-0.25, 0.03)                                    | 0.11               | -0.10 (-0.26, 0.07)                                    | 0.24               |
| Transferrin Saturation (%)   | -0.04 (-0.06, -0.03)                                 | <0.001             | -0.03 (-0.04, -0.01)                                   | <0.001             | -0.03 (-0.04, -0.01)                                   | <0.001             |
| Received IV Iron Therapy     | -0.57 (-0.97, 0.18)                                  | 0.005              | -0.24 (-0.56, 0.08)                                    | 0.13               | -0.26 (-0.64, 0.12)                                    | 0.18               |
| Body Mass Index              | -0.05 (-0.07, -0.03)                                 | <0.001             | -0.03 (-0.04, -0.01)                                   | 0.01               | -0.02 (-0.04, 0.01)                                    | 0.04               |
| Vascular Access (catheter)   | -0.26 (-0.59, 0.64)                                  | 0.11               |                                                        |                    | -0.06 (-0.37, 0.25)                                    | 0.72               |
| †IL-6 (pg/ml)                | 0.16 (0.05, 0.28)                                    | 0.01               | -0.05 (-0.14, 0.05)                                    | 0.35               | -0.09 (-0.21, 0.03)                                    | 0.15               |
| Myeloperoxidase (ng/ml)      | 0.01 (-0.01, 0.01)                                   | 0.47               |                                                        |                    | 0.01 (-0.01, 0.01)                                     | 0.72               |

Effect estimates of the association between various predictors and the natural log EPO resistance index (ERI) in univariate and multivariable analysis. Change in log ERI (95% CL) represents the change in the log ERI per unit change in the predictor (95% confidence interval).

Adjusted model 1 includes only variables significant in univariate analysis at P<0.1 level.

Adjusted model 2 includes all variables from the univariate analysis.

<sup>a</sup>P for overall trend across all quartiles = <0.001.

<sup>b</sup>P for overall trend across all quartiles = 0.002.

<sup>c</sup>P for overall trend across all quartiles = <0.001.

† Variable log-transformed.

**Supplemental Table 3. Baseline characteristics by 1-year mortality status in the entire cohort (no subjects excluded, n=187)**

|                                      | Subjects<br>alive at 1 year<br>(n=106) | Subjects<br>dead at 1 year<br>(n=81) | P value* |
|--------------------------------------|----------------------------------------|--------------------------------------|----------|
| Age, years                           | 69.5 ± 12.7                            | 70.1 ± 12.7                          | 0.76     |
| Female                               | 51 (48.1)                              | 40 (49.4)                            | 0.86     |
| White Race                           | 73 (68.9)                              | 57 (70.4)                            | 0.83     |
| <i>Co-morbidities</i>                |                                        |                                      |          |
| Diabetes mellitus                    | 31 (29.3)                              | 17 (21.0)                            | 0.20     |
| Coronary artery disease              | 13 (12.3)                              | 9 (11.1)                             | 0.81     |
| Congestive heart failure             | 20 (18.9)                              | 20 (25.0)                            | 0.34     |
| Vascular access: Catheter            | 58 (56.9)                              | 55 (71.4)                            | 0.05     |
| Body Mass Index (kg/m <sup>2</sup> ) | 26.5 ± 7.2                             | 26.5 ± 7.0                           | 0.95     |
| Systolic blood pressure (mmHg)       | 147.8 ± 22.5                           | 137.5 ± 25.2                         | 0.004    |
| Diastolic blood pressure (mmHg)      | 73.7 ± 11.6                            | 69.0 ± 13.6                          | 0.01     |
| Urea reduction ratio                 | 68.3 ± 10.6                            | 68.6 ± 8.7                           | 0.88     |
| <i>Laboratory data</i>               |                                        |                                      |          |
| Hemoglobin (g/dl)                    | 10.5 (9.7-11.3)                        | 10.6 (9.5-11.2)                      | 0.70     |
| Albumin (g/dl)                       | 3.5 (3.3-3.9)                          | 3.5 (3.2-3.8)                        | 0.10     |
| Ferritin (ng/ml)                     | 183 (100-324)                          | 200 (88-437)                         | 0.76     |
| Transferrin saturation (%)           | 19 (15-25)                             | 18 (13-24)                           | 0.21     |
| Phosphorus (mg/dl)                   | 4.6 (3.8-5.7)                          | 4.0 (3.2-5.0)                        | 0.01     |
| Parathyroid hormone (pg/ml)          | 221<br>(115-318)                       | 190<br>(98-439)                      | 0.92     |
| IL-6 (pg/ml)                         | 11.9<br>(6.0-31.0)                     | 25.9<br>(11.8-59.2)                  | 0.002    |
| Myeloperoxidase (ng/ml)              | 35.4<br>(19.6-69.6)                    | 38.2<br>(19.3-60.1)                  | 0.89     |

Categorical data are n (percentages). Continuous measures are means ± standard deviations. Laboratory values are median (quartile 1 – quartile 3). Values reflect baseline measurements taken during the first 90 days of initiating dialysis.

\*P values represent alive vs. dead chi square, Wilcoxon rank sum, or t-tests as appropriate.

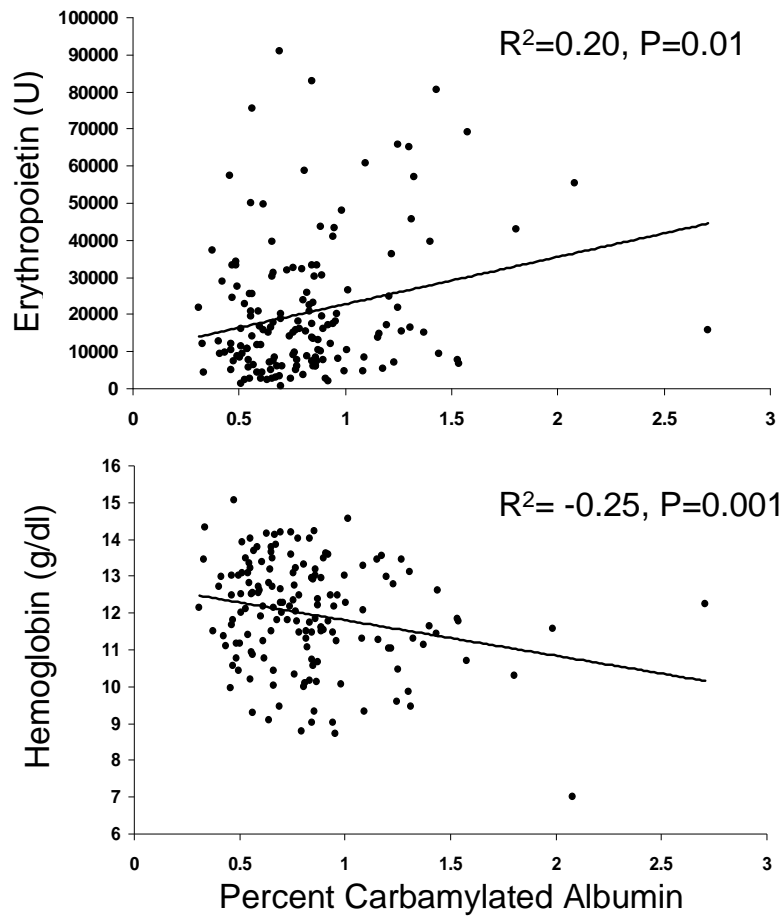

**Supplemental Figure 1.** Pearson correlations of percent carbamylated albumin level with erythropoietin dose and hemoglobin.

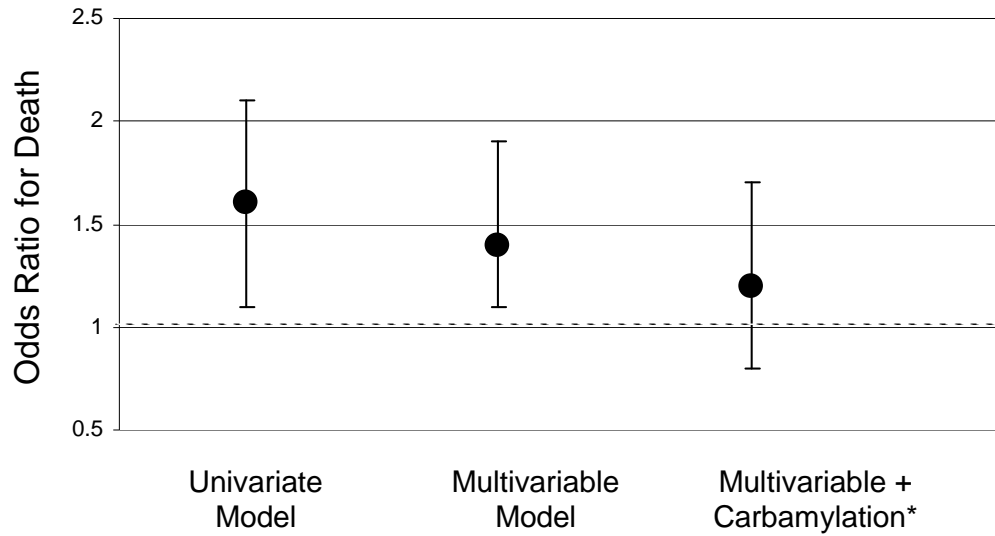

**Supplemental Figure 2.** Odds ratio for death by erythropoietin resistance index (no subjects excluded, n= 187)  
Odds ratios represent odds per unit change in natural log ERI. Bars are 95% confidence interval.  
Multivariable model includes systolic blood pressure, diastolic blood pressure, vascular access (catheter vs. no catheter), phosphorous, and IL6. \*In the final model, percent carbamylated albumin, highest vs. lowest quartile had an odds ratio for death of 4.3 (1.4-12.9), P 0.003.
